# Supplementary material for: Enhanced photoelectrical performance of TiO2 electrodes integrated with microtube-network structures
Source: Royal Society of Chemistry journal article supplement (doi:10.1039/b714323k), 2007-01-01
Supplement: b714323k.pdf [file b714323k.pdf]

### Supporting Information:

**Figure S1** The X-ray diffractometry (XRD) spectroscopy of calcined TiO<sub>2</sub> films illustrated the hydrothermal synthetical TiO<sub>2</sub> nanoparticles is entire anatase, which was confirmed by the X-ray diffractometer with Cu K $\alpha$  radiation (Rigaku D/max-2500)

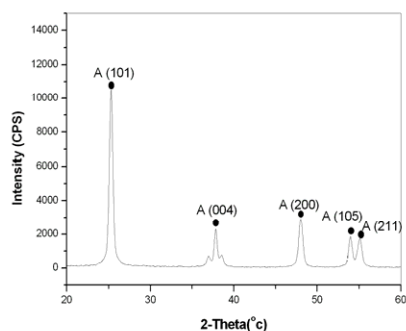

Figure S1

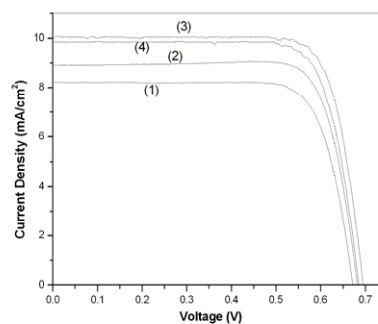

Figure S2

**Figure S2** *I-V* characteristics of DSSCs with Electrolyte A and (1) Nano-structured Electrode 1. (2) Microtube-structured Electrode 2 containing microtube derived from thermal removal of PS nanowire with the diameter size of 200-400 nm. (3) Microtube-structured Electrode 3 containing microtube network with the diameter size of 500-800 nm. (e) Microtube-structured Electrode 4 containing microtube network with the diameter size of 800-1200 nm.

**Table S1** Device performances of DSSCs with different electrodes and electrolytes.

| Device                    | PS nanowire            | $J_{sc}$ (mA/cm <sup>2</sup> ) | $V_{oc}$ (V) | $ff$ | $\eta$ |
|---------------------------|------------------------|--------------------------------|--------------|------|--------|
| Electrode 1/Electrolyte A | no                     | 8.22                           | 0.672        | 76%  | 4.26%  |
| Electrode 2/Electrolyte A | yes (12%) <sup>a</sup> | 8.91                           | 0.683        | 79%  | 4.85%  |
| Electrode 3/Electrolyte A | yes (15%)              | 10.06                          | 0.695        | 79%  | 5.53%  |
| Electrode 4/Electrolyte A | yes (18%)              | 9.84                           | 0.686        | 78%  | 5.26%  |
| Electrode 1/Electrolyte B | no                     | 8.26                           | 0.736        | 70%  | 4.23%  |
| Electrode 2/Electrolyte B | yes (12%)              | 8.62                           | 0.746        | 73%  | 4.69%  |
| Electrode 3/Electrolyte B | yes (15%)              | 10.56                          | 0.746        | 70%  | 5.55%  |
| Electrode 4/Electrolyte B | yes (18%)              | 9.1                            | 0.741        | 75%  | 5.05%  |

<sup>a</sup> The 12%, 15% and 18% are the concentration of PS/DMF solution used in electrospinning method. Electrode 2, 3 and 4 showed here are the TiO<sub>2</sub> electrodes with different sizes of microtube network. Electrode 1: Nano-structured Electrode 1; Electrode 2: TiO<sub>2</sub> electrode containing microtube network with the diameters of 200-400 nm; Electrode 3: TiO<sub>2</sub> electrode containing microtube network with the diameters of 500-800 nm; Electrode 4: TiO<sub>2</sub> electrode containing microtube network with the diameters of 800-1200 nm.
